# Supplementary material for: Iron carbide nanoplatelets: colloidal synthesis and characterization
Source: Royal Society of Chemistry journal article supplement (doi:10.1039/c9na00526a), 2019-01-01

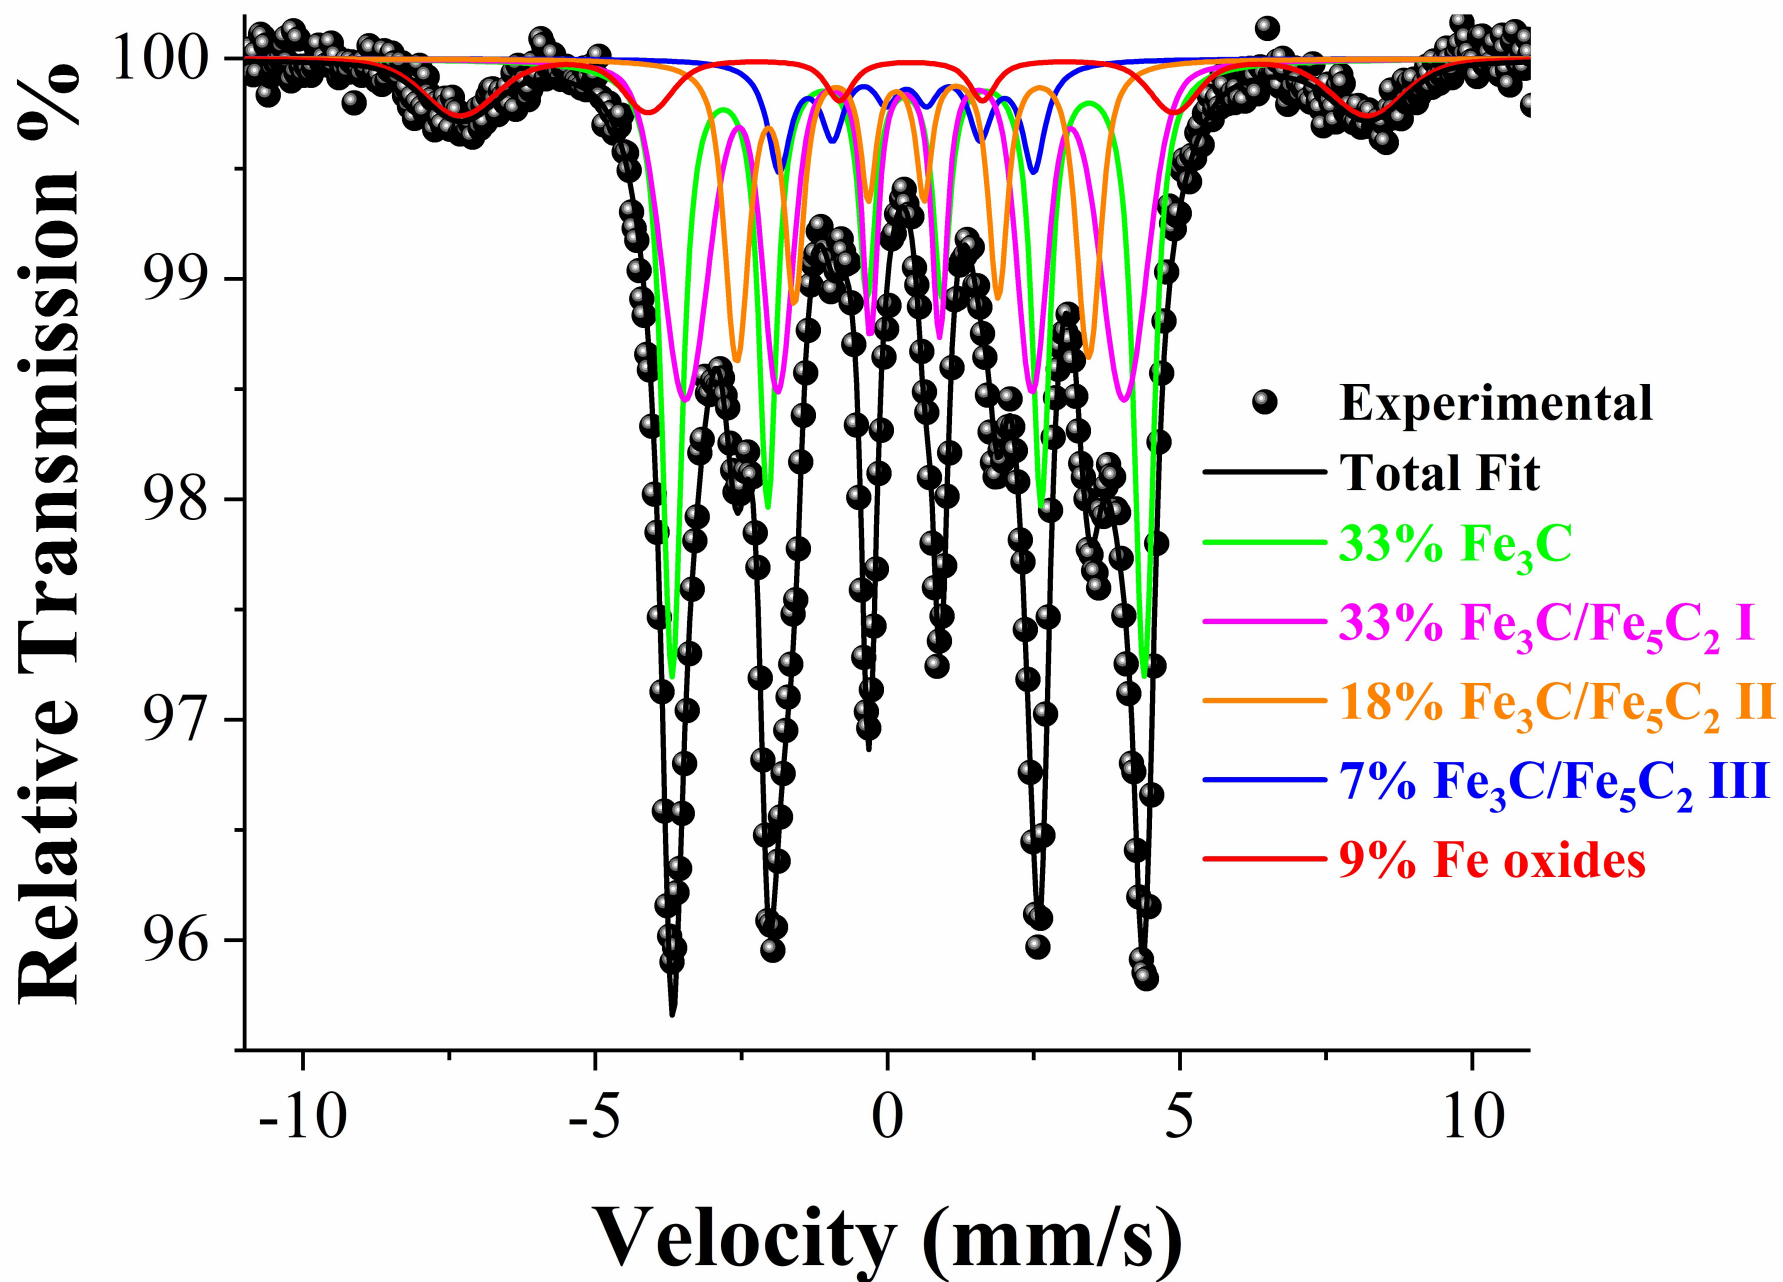

Supplement: c9na00526a2.pdf [file c9na00526a2.pdf]
